# Supplementary material for: One-step implementation of plasmon enhancement and solvent annealing effects for air-processed high-efficiency perovskite solar cells
Source: Royal Society of Chemistry journal article supplement (doi:10.1039/c8ta06970k), 2018-01-01
Supplement: c8ta06970k1.pdf [file c8ta06970k1.pdf]

Electronic Supplementary Information

**One-step implementation of plasmon enhancement and solvent  
annealing effects for air-processed high-efficiency perovskite solar  
cells†**

Yan Guo,<sup>a</sup> Xiong He,<sup>a</sup> Xin Liu,<sup>b</sup> Xin Li<sup>\*ab</sup> and Leilei Kang<sup>\*c</sup>

<sup>a</sup> MIIT Key Laboratory of Critical Materials Technology for New Energy Conversion and Storage, School of Chemistry and Chemical Engineering, Harbin Institute of Technology, Harbin 150001, China.

<sup>b</sup> State Key Lab of Urban Water Resource and Environment, Harbin Institute of Technology, Harbin 150090, China.

<sup>c</sup> Dalian Institute of Chemical Physics, Chinese Academy of Sciences, Dalian 116023, China.

\*Address correspondence to: [lixin@hit.edu.cn](mailto:lixin@hit.edu.cn) (X. Li); [leikang@dicp.ac.cn](mailto:leikang@dicp.ac.cn) (L.L. Kang)

## Experimental section

### 2.1 Materials

Cetyl trimethyl ammonium bromide ( $\text{C}_{19}\text{H}_{42}\text{BrN}$ , CTAB, > 99 %) was purchased from Sigma-Aldrich. Sodium borohydride ( $\text{NaBH}_4$ , 98 %), L-ascorbic acid, hydrogen tetrachloroaurate(III) trihydrate ( $\text{HAuCl}_4 \cdot 3\text{H}_2\text{O}$ , 99 %), zinc acetate dihydrate ( $\text{Zn}(\text{CH}_3\text{COO})_2 \cdot 2\text{H}_2\text{O}$ , 99.995 %) were obtained from Aladdin. Lead iodide ( $\text{PbI}_2$ , 99.999 %) and 4-tert-butylpyridine and lithium bis(trifluoromethanesulfonyl)imide (Li-TFSI, 99.9 %) were acquired from Kanto. Silver nitrate ( $\text{AgNO}_3$ , 99.8 %), potassium hydroxide (KOH, 95 %), methylammonium iodide ( $\text{CH}_3\text{NH}_3\text{I}$ , > 99 %) and 2, 2', 7, 7'-tetrakis-(N, N-di-4-methoxyphenylamino)-9, 9' spirobifluorene (Spiro-OMeTAD, 99.85 %) were respectively purchased from Energy Chemical, Tianjin Fengchuan Chemical Reagent Technologies Co., Ltd, Youxuan Trade and Toronto Technologies Co., Ltd. Other anhydrous solvent were purchased from J&K Chemical. Where all reagents were used as received without any further purification.

### 2.2 Preparation of ZnO nanoparticles

The ZnO nanoparticles (NPs) were synthesized following a procedure described in our previous work.<sup>1</sup> In a typical procedure, 2.36 g  $\text{Zn}(\text{CH}_3\text{COO})_2 \cdot 2\text{H}_2\text{O}$  was first dissolved in 100 mL of methanol solution. Then, 52 mL of KOH methanol solution (354 mM) was added dropwise into the aforementioned solution. Subsequently, the mixture was kept at 65 °C for 2.5 h under magnetic stirring, leading to the production of ZnO NPs. Then, the obtained ZnO NPs were washed with anhydrous methanol for three times to remove residual precursors. Finally, the ZnO NPs were dispersed into a solution of n-butanol-chloroform-methanol (14:1:1 volume ratio) to form a 20 mg/mL ZnO NPs suspension.

### 2.3 Preparation of Au nanorods

Au nanorods (NRs) were synthesized by a seed-mediated growth method, according to a reported procedure with some modification.<sup>2</sup> Firstly, 0.6 mL of 10 mM NaBH<sub>4</sub> aqueous solution was added to 10 mL of 100 mM CTAB aqueous solution containing 0.25 mM HAuCl<sub>4</sub> under stirring conditions. The mixed solution was vigorously stirred for 10 min before being transferred to a 30 °C water bath where it was left to stay for 12 hours resulting in a formation of brownish yellow Au seeds solution. In order to synthesize the Au NRs, 1 mL of 10 mM AgNO<sub>3</sub>, 5 mL of 10 mM HAuCl<sub>4</sub>, 1.6/0.8/0.4/0.2 mL of 2 M HCl, 0.55 mL of 100 mM ascorbic acid and 0.12 mL of Au seeds solution were sequentially added to 95 mL of 100 mM CTAB aqueous solution, and undisturbedly reacted overnight under room temperature. The resulting products were collected by centrifugation, and then the NRs were washed with deionized water for one time. Finally, the equivalent volume of Au NRs with different aspect ratio was redispersed in N, N-dimethylformamide (DMF), forming a 0.5 M suspension.

### 2.4 Fabrication of ZnO-based PSCs

All ZnO-based PSC devices were fabricated on FTO glass substrates (1.5 cm × 2.0 cm). FTO substrates were first etched by zinc powder and 6 M HCl, and ultrasonically cleaned successively with detergent, deionized water, acetone, 2-propanol, ethanol, followed by an UV-ozone treatment for 20 min. After that, the electron transport material was deposited onto the substrates by spin-coating ZnO solution at 500 rpm. for 3 s and 3000 rpm. for 30 s and dried at room temperature for 10 min. This process was repeated two times to obtain a compact ZnO film. Then, the ZnO film was aged 24 h under ambient conditions. Subsequently, the Au NRs DMF suspension (0.5 M) was spin-coated onto the surface of FTO/ZnO at 500 rpm. for 5 s and 1500 rpm. for 60 s and then dried at 30 °C for 10 min. The perovskite layer was synthesized by a two-step

spin-coating fabrication protocol. The  $\text{PbI}_2$  DMF solution (460 mg /mL) was first spin-coated on the FTO/ZnO film at 3000 rpm. for 30 s and annealed at 70 °C for 10 min. Then, a solution of  $\text{CH}_3\text{NH}_3\text{I}$  in 2-propanol (50 mg/mL) was spin-coated on the surface of  $\text{PbI}_2$  film at 1000 rpm. for 5 s and 3000 rpm. for 25 s and annealed at 80 °C for 30 min in a closed petri dish to form a highly crystalline and compact without pinhole  $\text{CH}_3\text{NH}_3\text{PbI}_3$  (MAPbI<sub>3</sub>) layer. After the FTO/ZnO/Au NRs/MAPbI<sub>3</sub> films were cooled down to the room temperature, the Spiro-OMeTAD hole transfer layer (80 mg of Spiro-OMeTAD, 28.5  $\mu\text{L}$  4-tert-butylpyridine, 17.5  $\mu\text{L}$  Li-TFSI (520 mg of Li-TFSI in 1 mL of acetonitrile) all dissolved in 1 mL chlorobenzene) was deposited on the top of FTO/ZnO/MAPbI<sub>3</sub> film by spin-coating at 4000 rpm. for 30 s. Finally, about 60 nm thick Au counter electrode was deposited on top of Spiro-OMeTAD film via vacuum thermal evaporation at an evaporation rate 1.0 Å/s. As a control experiment, the PSC devices without Au NRs were fabricated under the same fabrication conditions as well. In order to further investigate the possible improvement mechanisms of perovskite crystal, we also designed and fabricated the films of ZnO/MAPbI<sub>3</sub>, ZnO/Au NRs/MAPbI<sub>3</sub> and ZnO/DMF/MAPbI<sub>3</sub> films according to the above operating procedure. The active area of PSCs was confirmed to be 0.12 cm<sup>2</sup> by a non-reflective metal mask. All processes including fabrication, measurement and storage of devices were carried out under ambient conditions. The environmental temperature and relative humidity for the fabrication process, *J-V* measurement and photo-stability investigation were about 25 °C and 50 %, respectively. The average relative humidity was about 40 % when studying the long-term ambient atmosphere stability.

## 2.5 Characterization

X-ray absorption near edge structure (XANES) at the Zn K-edge (9659 eV) were recorded at the BL14W1, Shanghai Synchrotron Radiation Facility (SSRF), Shanghai

Institute of Applied Physics (SINAP), China. The energy was calibrated by Zn foil. The spectra were collected at room temperature via the fluorescence mode. The light source is portable xenon lamp. X-ray diffraction (XRD) pattern was used to analyze crystal structure, which was recorded on a Panalytical Empyrean X-ray diffractometer with a Cu K $\alpha$  radiation ( $\lambda = 1.540598 \text{ \AA}$ ) at a scan rate of  $2^\circ/\text{min}$ . The morphologies of nanoparticles and films as well as the element EDS mappings were analyzed by Cold Field Emission scanning electron microscopy (SEM, Hitachi, SU8000) and transmission electron microscope (TEM, JEOL, JEM-2100). Atomic force scanning probe microscope (AFM, Bruker, Dimension Icon) was used to perform AFM high image and scanning Kelvin probe microscope (SKPM) tests. Photoluminescence (PL) spectra and PL mappings were performed on a Renishaw in Via confocal micro-Raman spectroscopy system ( $\lambda = 633$  or  $532 \text{ nm}$ ). Ultraviolet-visible (UV-vis) absorption spectroscopy measurements were conducted on TU1901 spectrometer (Beijing Purkinje General Instrument Co., Ltd). Static water contact angle was tested using a JC2000C1 contact angle instrument.

Photocurrent density-photovoltage ( $J$ - $V$ ) curves of PSCs and conductivity tests were measured by a binding unit of electrochemical workstation (VersaSTAT 3, Ametek, USA) and a class ABB solar simulator (model 94021A, Newport, USA), where the cells were illuminated using an AM 1.5G sunlight ( $100 \text{ mW cm}^{-2}$ ) generating from 150 W xenon lamp optical source, and the intensity of light was standardized by a Newport Oriel standard PV reference cell system (model 91150 V). The scan rate was  $0.2 \text{ V/s}$ . Electrochemical impedance spectra (EIS) were performed using a VersaSTAT 3 electrochemical workstation (Ametek, USA) at a frequency ranging from  $10^6$  to  $0.1 \text{ Hz}$  with  $5 \text{ mV}$  amplitude in the dark condition. The EIS data was fitted by the software of ZView2 according to the equivalent circuit model. Incident photon-to-electron

conversion efficiency (IPCE) was recorded by a QTest Station 500D solar cell quantum efficiency measurement system (CROWNTECH, USA) equipped with a 300 W tungsten lamp power source, a QEM11-S 1/8 m monochromator, a Keithley 2000 multimeter and an opaque chamber. Hall data were collected by a Hall 8800 system.

**Table S1** Summary of references about application of Au or Ag NPs in PSCs.

| Device structure                                                                                                                                              | Preparations conditions      | $J_{sc}$<br>(mA cm <sup>-2</sup> ) | $V_{oc}$<br>(V) | FF<br>(%) | PCE<br>(%) | Ref.           |
|---------------------------------------------------------------------------------------------------------------------------------------------------------------|------------------------------|------------------------------------|-----------------|-----------|------------|----------------|
| FTO/ZnO/Au NRs/CH <sub>3</sub> NH <sub>3</sub> PbI <sub>3</sub> /Spiro-OMeTAD/Au                                                                              | In Air                       | 22.52                              | -1.026          | 71.45     | 16.51      | <b>Current</b> |
| FTO/ZnO/CH <sub>3</sub> NH <sub>3</sub> PbI <sub>3</sub> /Spiro-OMeTAD/Au                                                                                     |                              | 20.58                              | -1.021          | 68.86     | 14.47      |                |
| FTO/c-TiO <sub>2</sub> /Au@SiO <sub>2</sub> -m-Al <sub>2</sub> O <sub>3</sub> /MAPbI <sub>3-x</sub> Cl <sub>x</sub> /Spiro-OMeTAD/Ag                          | In air                       | 16.91                              | -1.02           | 64        | 11.4       | <b>Ref. 12</b> |
| FTO/c-TiO <sub>2</sub> /m-Al <sub>2</sub> O <sub>3</sub> /MAPbI <sub>3-x</sub> Cl <sub>x</sub> /Spiro-OMeTAD/Ag                                               |                              | 14.76                              | -1.04           | 67        | 10.7       |                |
| FTO/c-TiO <sub>2</sub> /m-TiO <sub>2</sub> @Au NSs/Triple cation perovskite/Spiro-OMeTAD/Au                                                                   | N <sub>2</sub> -filled       | 22.97                              | -1.08           | 71        | 17.72      | <b>Ref. 13</b> |
| FTO/c-TiO <sub>2</sub> /m-TiO <sub>2</sub> /Triple cation perovskite/Spiro-OMeTAD/Au                                                                          | glove box                    | 21.14                              | -1.05           | 69        | 15.19      |                |
| FTO/c-TiO <sub>2</sub> /m-TiO <sub>2</sub> -Au@Ag nanocuboids/CH <sub>3</sub> NH <sub>3</sub> PbI <sub>3-x</sub> Cl <sub>x</sub> /Spiro-OMeTAD/Au             | Glovebox                     | 23.6                               | -1.04           | 74.6      | 18.31      | <b>Ref. 14</b> |
|                                                                                                                                                               |                              | 21.13                              | -1.01           | 74.1      | 15.56      |                |
| FTO/c-TiO <sub>2</sub> /m-TiO <sub>2</sub> /CH <sub>3</sub> NH <sub>3</sub> PbI <sub>3-x</sub> Cl <sub>x</sub> /Spiro-OMeTAD/Au                               |                              |                                    |                 |           |            |                |
| FTO/ZnO/CH <sub>3</sub> NH <sub>3</sub> PbI <sub>3</sub> /mPEG-Au NSs@Spiro-OMeTAD/Ag                                                                         | N <sub>2</sub> -filled       | 18.65                              | -1.053          | 72.59     | 13.97      | <b>Ref. 15</b> |
| FTO/ZnO/CH <sub>3</sub> NH <sub>3</sub> PbI <sub>3</sub> /Spiro-OMeTAD/Ag                                                                                     | glove box                    | 17.78                              | -1.034          | 69.66     | 12.49      |                |
| FTO/c-TiO <sub>2</sub> /p-TiO <sub>2</sub> -Au@TiO <sub>2</sub> NRs/CH <sub>3</sub> NH <sub>3</sub> PbI <sub>3</sub> -Au@TiO <sub>2</sub> NRs/Spiro-OMeTAD/Ag | A                            | 23.12                              | -1.04           | 75.5      | 18.24      | <b>Ref. 16</b> |
|                                                                                                                                                               |                              | 17.4                               | -0.98           | 73.7      | 12.59      |                |
| FTO/c-TiO <sub>2</sub> /p-TiO <sub>2</sub> /CH <sub>3</sub> NH <sub>3</sub> PbI <sub>3</sub> /Spiro-OMeTAD/Ag                                                 |                              |                                    |                 |           |            |                |
| ITO/Au@TiO <sub>2</sub> -TiAc <sub>2</sub> -stabilized TiO <sub>2</sub> /CH <sub>3</sub> NH <sub>3</sub> PbI <sub>3-x</sub> Cl <sub>x</sub> /Spiro-OMeTAD/Au  | N <sub>2</sub><br>atmosphere | 22.27                              | -1.009          | 74.67     | 16.78      | <b>Ref. 21</b> |
|                                                                                                                                                               |                              | 20.78                              | -1.005          | 74.26     | 15.51      |                |
| ITO/TiAc <sub>2</sub> -stabilized TiO <sub>2</sub> /CH <sub>3</sub> NH <sub>3</sub> PbI <sub>3-x</sub> Cl <sub>x</sub> /Spiro-OMeTAD/Au                       |                              |                                    |                 |           |            |                |
| ITO/NiO/3 nm-thick Au film/CH <sub>3</sub> NH <sub>3</sub> PbI <sub>3</sub> /PC <sub>71</sub> BM/Ag                                                           | N <sub>2</sub> -filled       | 15.9                               | -0.75           | 48.6      | 5.1        | <b>Ref. 22</b> |
| ITO/NiO/CH <sub>3</sub> NH <sub>3</sub> PbI <sub>3</sub> /PC <sub>71</sub> BM/Ag                                                                              | glove box                    | 10.0                               | -0.87           | 36.6      | 2.6        |                |
| ITO/TiO <sub>x</sub> -Au NPs-TiO <sub>x</sub> /CH <sub>3</sub> NH <sub>3</sub> PbI <sub>3-x</sub> Cl <sub>x</sub> /Spiro-OMeTAD/Ag                            | Glovebox                     | 19.9                               | -1.08           | 76        | 16.2       | <b>Ref. 38</b> |
| ITO/TiO <sub>x</sub> /CH <sub>3</sub> NH <sub>3</sub> PbI <sub>3-x</sub> Cl <sub>x</sub> /Spiro-OMeTAD/Ag                                                     |                              | 18.3                               | -1.00           | 72        | 13.2       |                |

“A” indicates that the operating conditions of device are not mentioned in the literature.

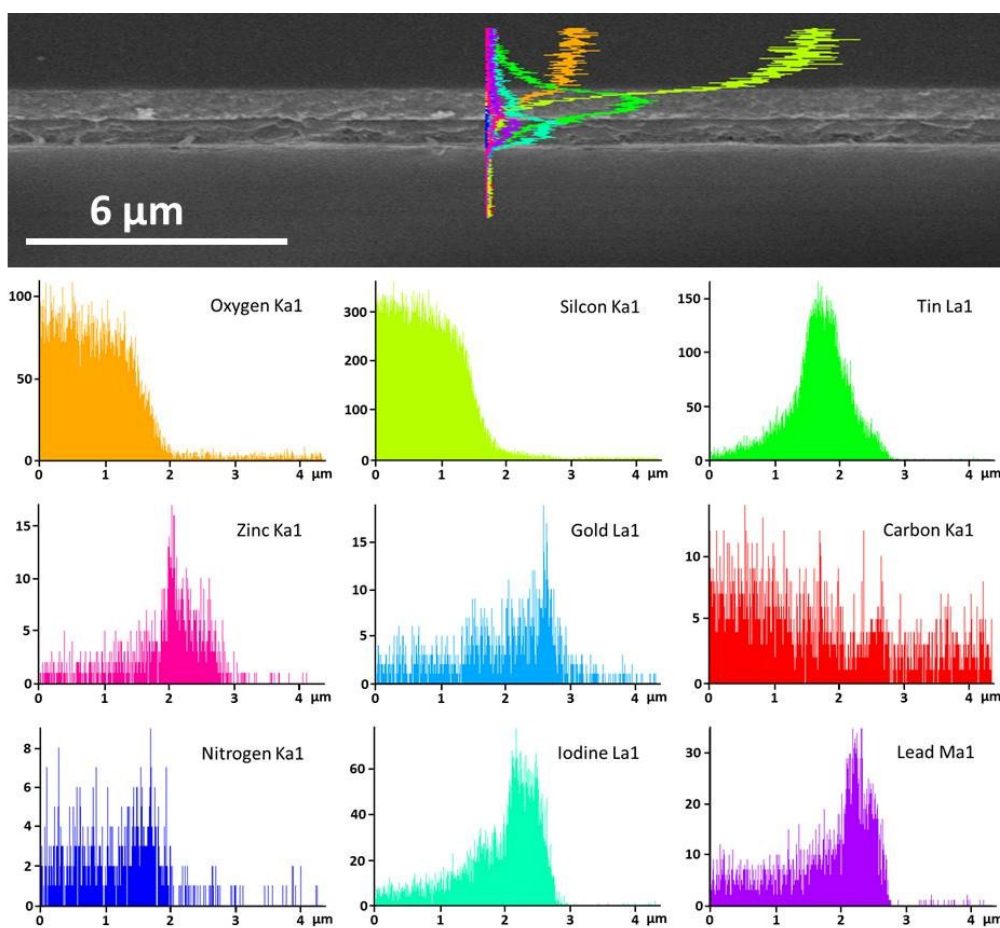

**Fig. S1** Cross-sectional SEM image of a complete device based on the structure of glass/FTO/ZnO/Au NRs/MAPbI<sub>3</sub>/Spiro-OMeTAD/Au and corresponding EDS line scan of element of O, Si, Sn, Zn, Au, C, N, I and Pb.

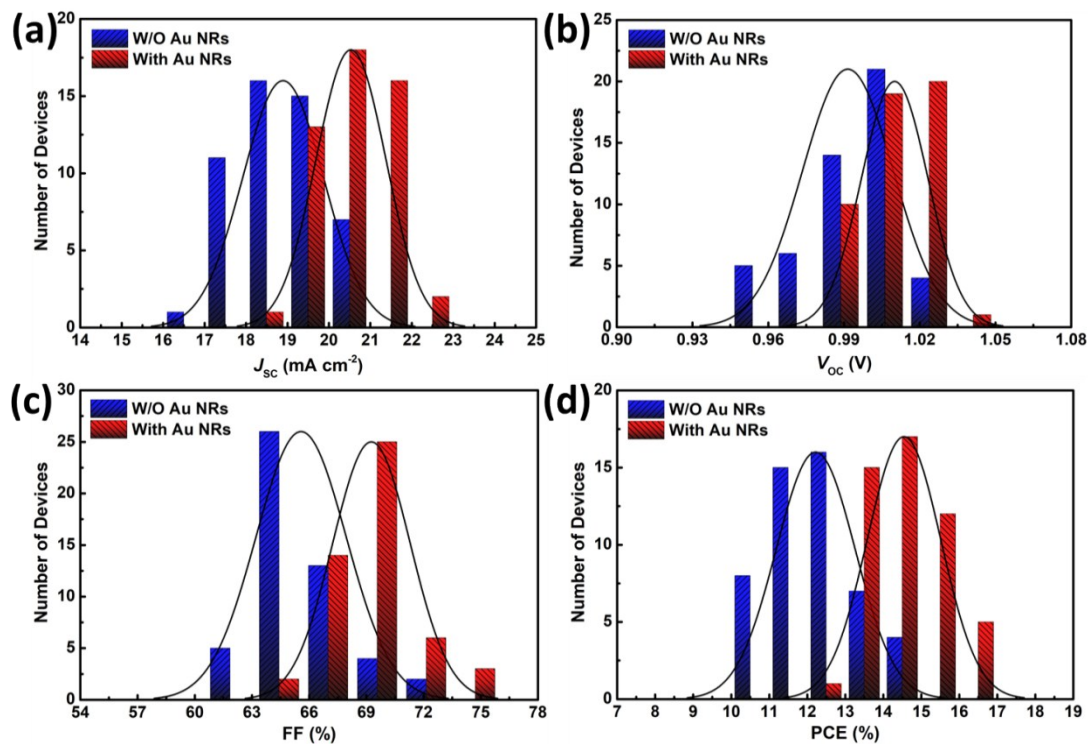

**Fig. S2** Statistic distribution histograms of 50 PSC devices with and without Au NRs: (a)  $J_{sc}$ , (b)  $V_{oc}$ , (c) FF and (d) PCE. The Gaussian fit is provided as a guide to eyes.

$$\text{Hysteresis index} = \frac{J_{\text{RS}}(0.8V_{\text{OC}}) - J_{\text{FS}}(0.8V_{\text{OC}})}{J_{\text{RS}}(0.8V_{\text{OC}})} \quad (1)$$

**Equation (1):**  $J_{\text{RS}}(0.8V_{\text{OC}})$  and  $J_{\text{FS}}(0.8V_{\text{OC}})$  represent photocurrent density at 80 % of  $V_{\text{oc}}$  for the reverse scan (RS) and forward scan (FS), respectively.

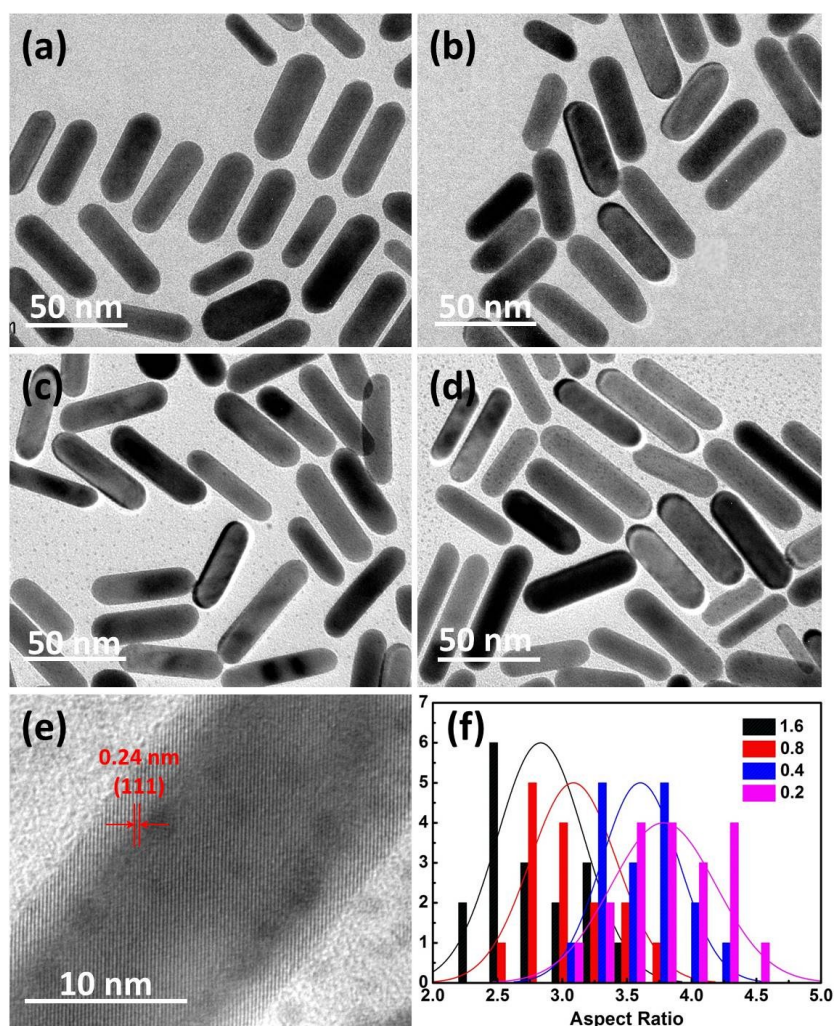

**Fig. S3** TEM images of Au NRs obtained from (a) 1.6 mL, (b) 0.8 mL, (c) 0.4 mL and (d) 0.2 mL HCl additives. (e) HRTEM image taken from a single Au NRs. (f) The distribution of aspect ratios of Au NRs measured from Fig. (a) to (d).

**Table S2** Average aspect ratio as well as their associated standard deviations of Au NRs obtained by regulating the addition volume of hydrochloric acid.

| Data Set                    | a         | b         | c         | d         |
|-----------------------------|-----------|-----------|-----------|-----------|
| Volume of Hydrochloric Acid | 1.6       | 0.8       | 0.4       | 0.2       |
| Aspect Ratio                | 2.83±0.34 | 3.09±0.34 | 3.60±0.30 | 3.80±0.40 |

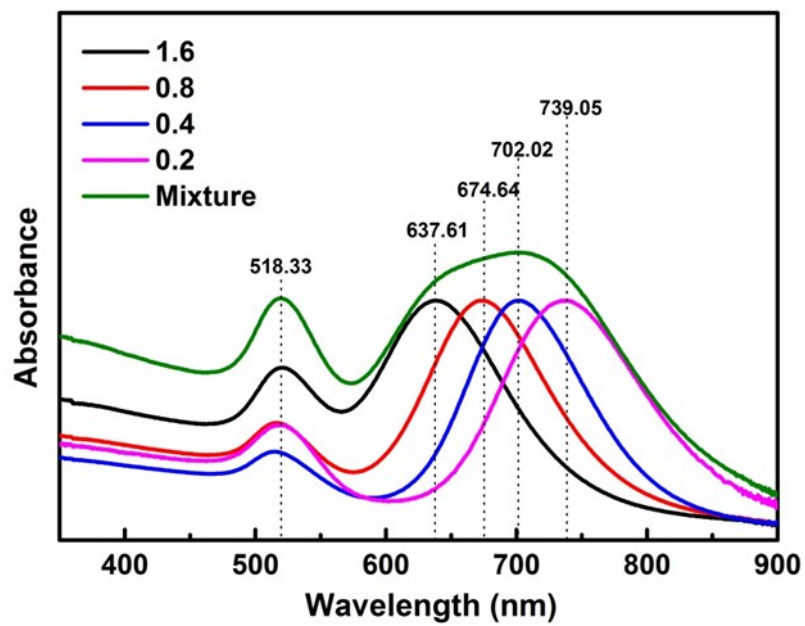

**Fig. S4** UV-vis absorption spectra of Au NRs with different aspect ratios and Au NRs mixture.

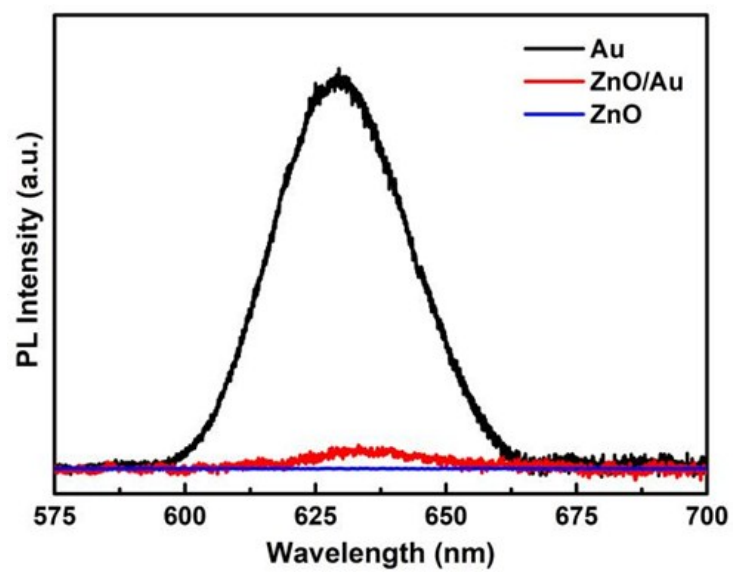

**Fig. S5** PL spectra of Au NRs coated on glass and glass/ZnO film as well as pure ZnO film excited by 532 nm laser.

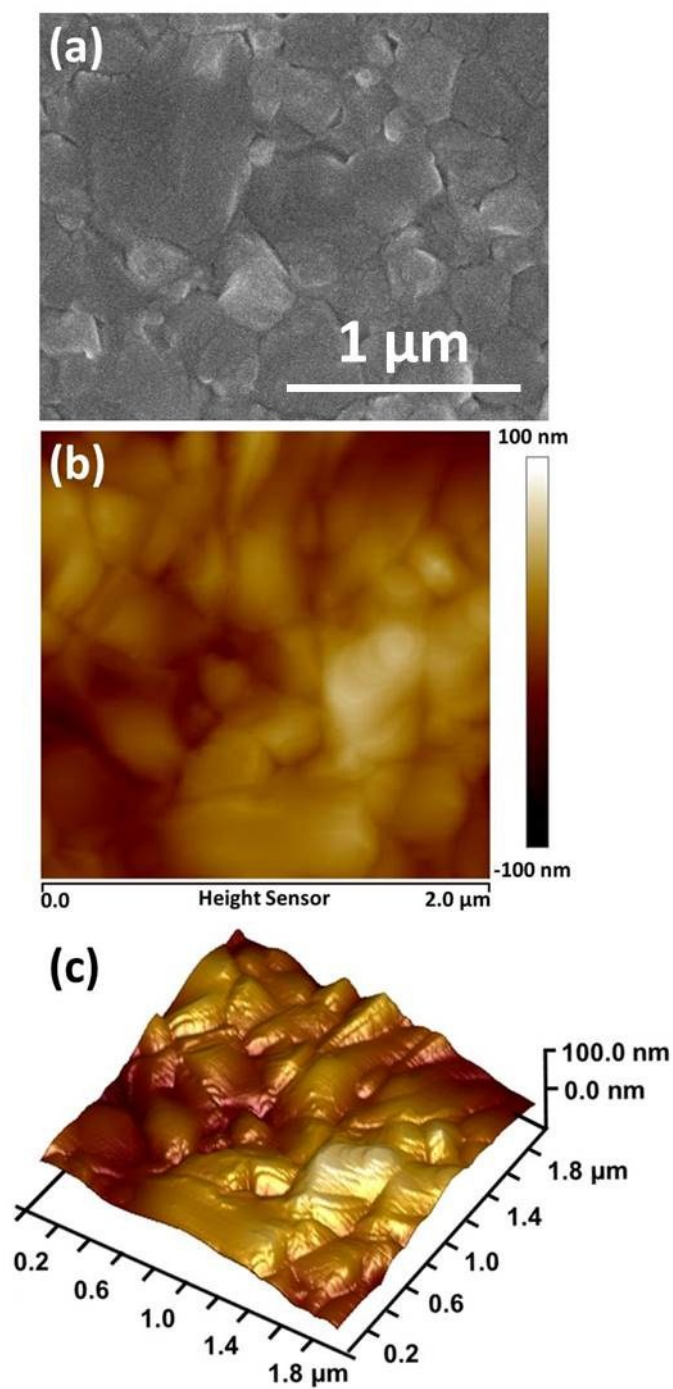

**Fig. S6** Top view SEM image (a), AFM height image (b) and corresponding 3D AFM height image (c) of  $\text{MAPbI}_3$  coated on the DMF processed ZnO film.

**Table S3** Assignments of XRD peaks in Fig. 5a.

| 2 $\theta$ (°) | Index | Composite          |
|----------------|-------|--------------------|
| 12.65          | 001   | PbI <sub>2</sub>   |
| 13.95          | 002   | MAPbI <sub>3</sub> |
| 14.08          | 110   | MAPbI <sub>3</sub> |
| 19.97          | 112   | MAPbI <sub>3</sub> |
| 23.47          | 211   | MAPbI <sub>3</sub> |
| 24.46          | 202   | MAPbI <sub>3</sub> |
| 26.46          | 221   | MAPbI <sub>3</sub> |
| 28.13          | 004   | MAPbI <sub>3</sub> |
| 28.46          | 220   | MAPbI <sub>3</sub> |
| 31.61          | 222   | MAPbI <sub>3</sub> |
| 31.89          | 310   | MAPbI <sub>3</sub> |
| 33.65          | 102   | PbI <sub>2</sub>   |
| 34.96          | 204   | MAPbI <sub>3</sub> |
| 37.70          | 321   | MAPbI <sub>3</sub> |
| 40.48          | 224   | MAPbI <sub>3</sub> |
| 43.14          | 314   | MAPbI <sub>3</sub> |

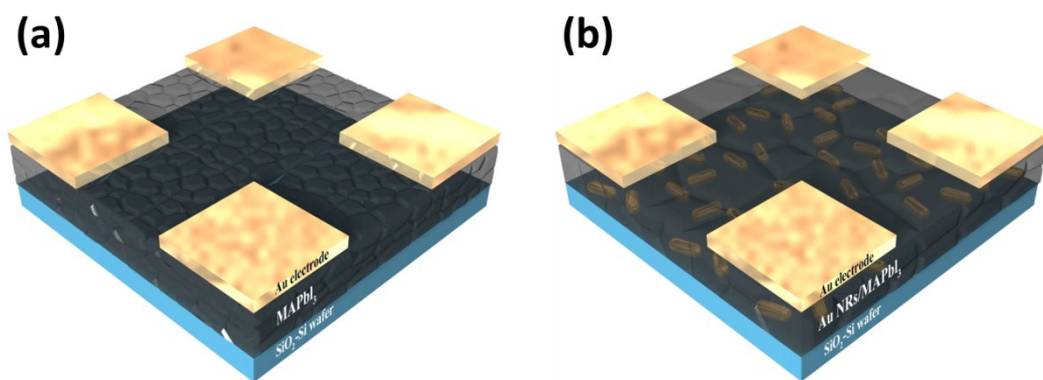

**Fig. S7** Structures of devices used to Hall effect measurements. (a) SiO<sub>2</sub>-Si wafer/  
/MAPbI<sub>3</sub>/Au electrode. (b) SiO<sub>2</sub>-Si wafer/Au NRs/MAPbI<sub>3</sub>/Au electrode.

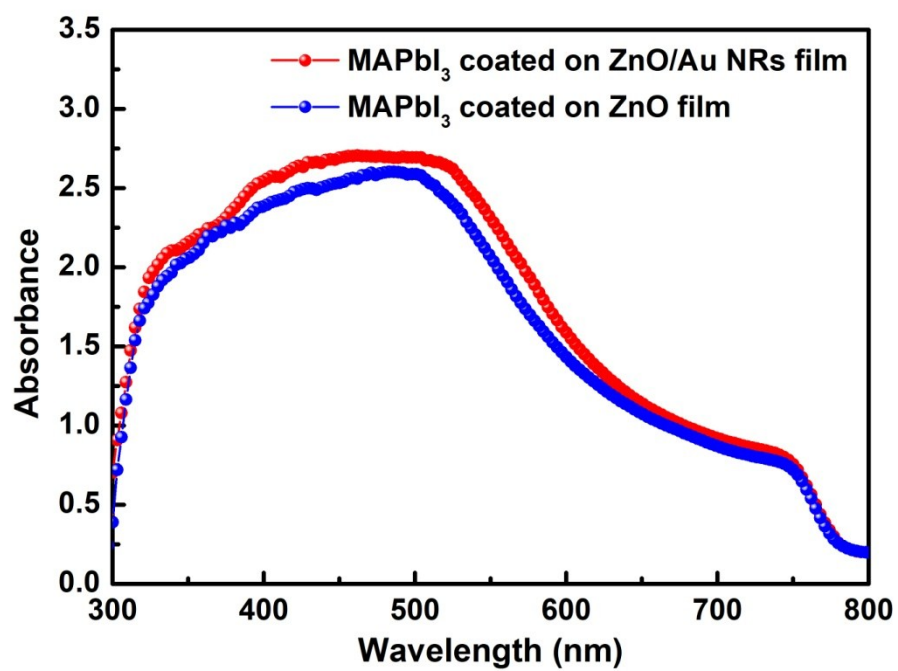

**Fig. S8** UV-vis absorption spectra of MAPbI<sub>3</sub> coated on the ZnO and ZnO/Au NRs film.

**Table S4** ZView2 fitting parameters obtained from the EIS data of the champion devices with and without Au NRs.

| Type        | $R_S$ ( $\Omega$ ) | $R_{CT}$ ( $\Omega$ ) | C (F)                  |
|-------------|--------------------|-----------------------|------------------------|
| Control     | 13.82              | 62.15                 | 2.1077 E <sup>-8</sup> |
| With Au NRs | 13.62              | 33.41                 | 2.4237 E <sup>-8</sup> |

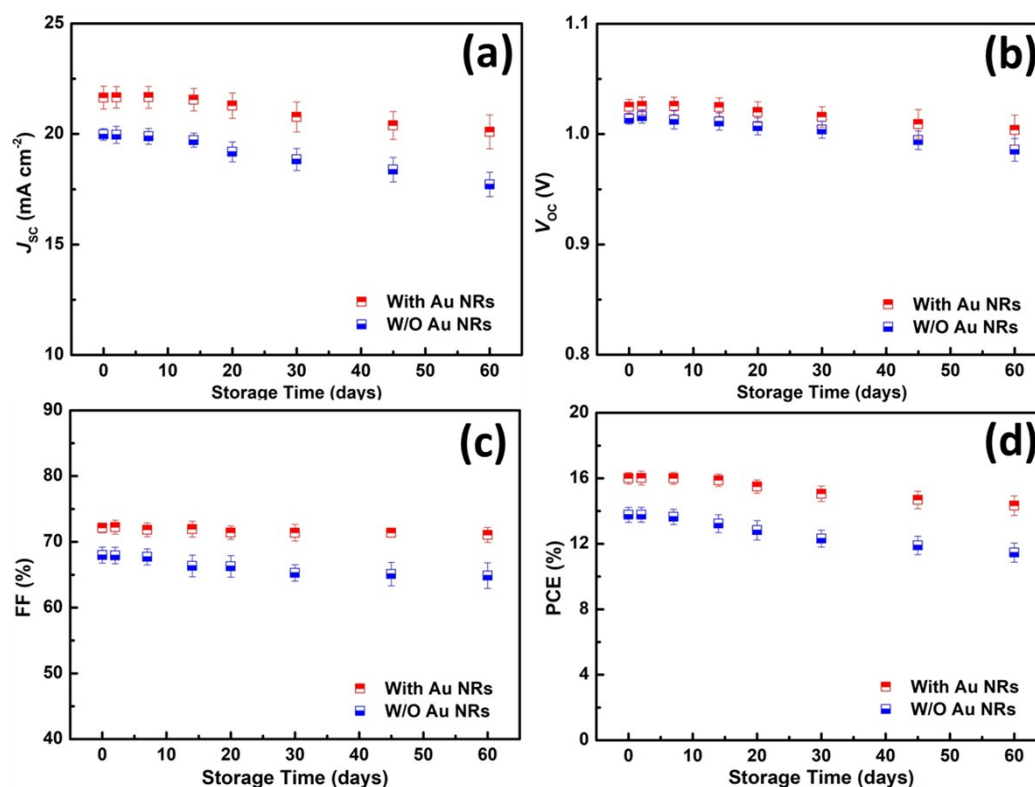

**Fig. S9** Changing of (a)  $J_{sc}$ , (b)  $V_{oc}$ , (c) FF and (d) PCE of ten Au NRs-ZnO-based PSCs and ZnO-based PSCs with the extension of storage period. The devices were stored in an ambient condition with about 40% relative humidity at 25 °C. Error bars represent the standard deviations.

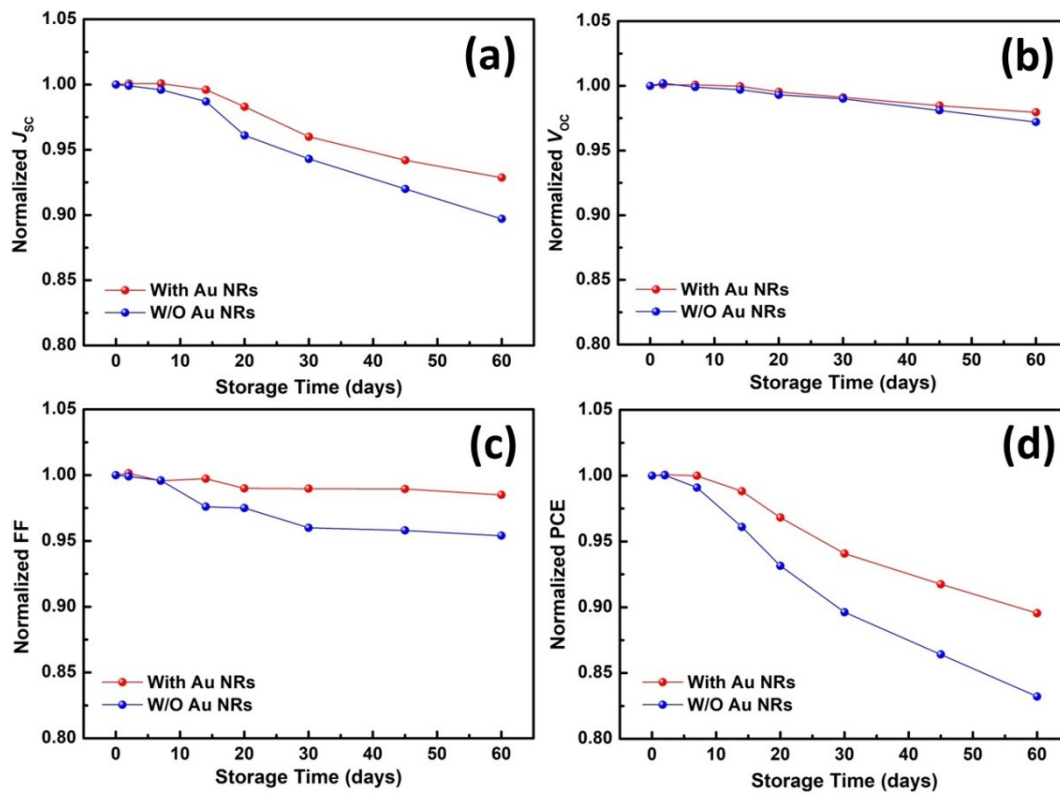

**Fig. S10** Changing of normalized (a)  $J_{sc}$ , (b)  $V_{oc}$ , (c) FF and (d) PCE of ten Au NRs-ZnO-based PSCs and ZnO-based PSCs with the extension of storage period, where the relative humidity and temperature of storage environment are about 40 % and 25 °C, respectively.

**Table S5** Performance parameters and normalized performance parameters of ten Au NRs-ZnO-based PSCs with the extension of storage period.

| Storage Time<br>(days) | $J_{SC}$ (mA cm <sup>-2</sup> )/<br>Normalized $J_{SC}$ | $V_{OC}$ (V)/<br>Normalized $V_{OC}$ | FF (%)/<br>Normalized FF | PCE (%)/<br>Normalized PCE |
|------------------------|---------------------------------------------------------|--------------------------------------|--------------------------|----------------------------|
| 0                      | 21.64±0.52 / 1.0000                                     | 1.0247±0.0067 / 1.0000               | 72.13±0.75 / 1.0000      | 16.002±0.356 / 1.0000      |
| 2                      | 21.66±0.49 / 1.0009                                     | 1.0255±0.0080 / 1.0008               | 72.23±1.05 / 1.0014      | 16.014±0.418 / 1.0007      |
| 7                      | 21.66±0.50 / 1.0008                                     | 1.0255±0.0079 / 1.0008               | 71.82±1.05 / 0.9957      | 16.001±0.370 / 0.9999      |
| 14                     | 21.55±0.51 / 0.9960                                     | 1.0244±0.0084 / 0.9997               | 71.93±1.20 / 0.9973      | 15.879±0.378 / 0.9882      |
| 20                     | 21.28±0.57 / 0.9830                                     | 1.0199±0.0093 / 0.9953               | 71.40±1.03 / 0.9899      | 15.493±0.404 / 0.9682      |
| 30                     | 20.77±0.68 / 0.9600                                     | 1.0156±0.0093 / 0.9911               | 71.39±1.27 / 0.9897      | 15.055±0.472 / 0.9408      |
| 45                     | 20.39±0.63 / 0.9420                                     | 1.0090±0.0132 / 0.9847               | 71.37±0.66 / 0.9895      | 14.682±0.531 / 0.9175      |
| 60                     | 20.10±0.77 / 0.9286                                     | 1.0037±0.0136 / 0.9795               | 71.05±1.14 / 0.9850      | 14.329±0.599 / 0.8955      |

**Table S6** Performance parameters and normalized performance parameters of ten ZnO-based PSCs with the extension of storage period.

| Storage Time<br>(days) | $J_{SC}$ (mA cm <sup>-2</sup> )/<br>Normalized $J_{SC}$ | $V_{OC}$ (V)/<br>Normalized $V_{OC}$ | FF (%)/<br>Normalized FF | PCE (%)/<br>Normalized PCE |
|------------------------|---------------------------------------------------------|--------------------------------------|--------------------------|----------------------------|
| 0                      | 19.98±0.26 / 1.0000                                     | 1.0140±0.0050 / 1.0000               | 67.98±1.22 / 1.0000      | 13.770±0.460 / 1.0000      |
| 2                      | 19.96±0.38 / 0.9991                                     | 1.0160±0.0060 / 1.0020               | 67.92±1.24 / 0.9991      | 13.774±0.456 / 1.0003      |
| 7                      | 19.90±0.36 / 0.9958                                     | 1.0129±0.0082 / 0.9989               | 67.71±1.23 / 0.9960      | 13.646±0.466 / 0.9910      |
| 14                     | 19.72±0.32 / 0.9870                                     | 1.0113±0.0078 / 0.9973               | 66.34±1.64 / 0.9759      | 13.232±0.552 / 0.9610      |
| 20                     | 19.19±0.45 / 0.9606                                     | 1.0070±0.0077 / 0.9931               | 66.28±1.64 / 0.9750      | 12.827±0.587 / 0.9315      |
| 30                     | 18.85±0.50 / 0.9434                                     | 1.0040±0.0077 / 0.9901               | 65.28±1.23 / 0.9603      | 12.312±0.519 / 0.8962      |
| 45                     | 18.38±0.56 / 0.9202                                     | 0.9944±0.0083 / 0.9807               | 65.09±1.79 / 0.9575      | 11.899±0.557 / 0.8641      |
| 60                     | 17.72±0.55 / 0.8968                                     | 0.9857±0.0102 / 0.9721               | 64.87±1.95 / 0.9543      | 11.459±0.582 / 0.8322      |

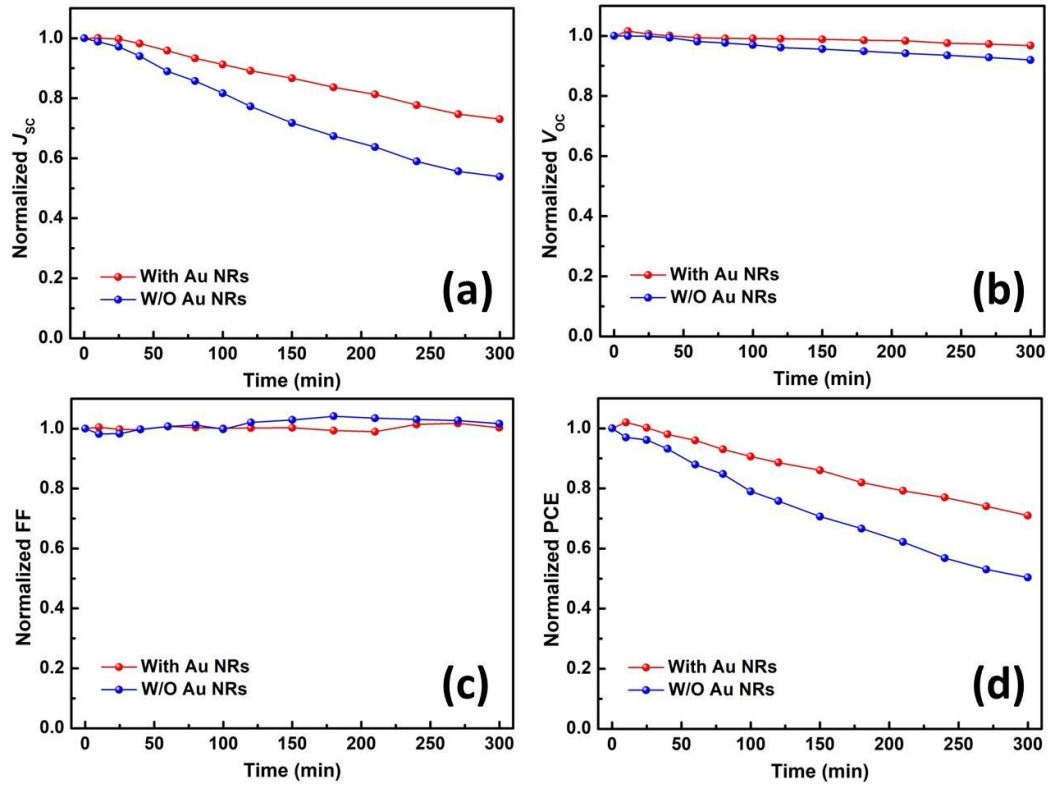

**Fig. S11** Changing of normalized (a)  $J_{sc}$ , (b)  $V_{oc}$ , (c) FF and (d) PCE of ten Au NRs-ZnO-based PSCs and ZnO-based PSCs as a function of illumination time, where the relative humidity and temperature of illumination environment are about 50 % and 25 °C, respectively.

**Table S7** Performance parameters and normalized performance parameters of ten Au NRs-ZnO-based PSCs with the extension of illumination time.

| Illumination<br>Time (min) | $J_{SC}$ (mA cm <sup>-2</sup> )/<br>Normalized $J_{SC}$ | $V_{OC}$ (V)/<br>Normalized $V_{OC}$ | FF (%)/<br>Normalized FF | PCE (%)/<br>Normalized PCE |
|----------------------------|---------------------------------------------------------|--------------------------------------|--------------------------|----------------------------|
| 0                          | 21.89±0.42 / 1.0000                                     | 1.0259±0.0062 / 1.0000               | 71.33±0.75 / 1.0000      | 15.99±0.25 / 1.0000        |
| 10                         | 21.90±0.39 / 1.0005                                     | 1.0409±0.0049 / 1.0155               | 71.65±0.69 / 1.0044      | 16.31±0.21 / 1.0200        |
| 25                         | 21.83±0.35 / 0.9973                                     | 1.0321±0.0051 / 1.0060               | 71.15±0.81 / 0.9975      | 16.02±0.29 / 1.0019        |
| 40                         | 21.50±0.46 / 0.9822                                     | 1.0265±0.0053 / 1.0006               | 71.11±0.79 / 0.9969      | 15.67±0.31 / 0.9800        |
| 60                         | 20.98±0.48 / 0.9584                                     | 1.0198±0.0057 / 0.9940               | 71.84±0.59 / 1.0071      | 15.35±0.28 / 0.9600        |
| 80                         | 20.42±0.51 / 0.9328                                     | 1.0173±0.0055 / 0.9916               | 71.59±0.88 / 1.0036      | 14.87±0.35 / 0.9300        |
| 100                        | 19.97±0.45 / 0.9123                                     | 1.0169±0.0064 / 0.9912               | 71.38±0.89 / 1.0007      | 14.49±0.29 / 0.9062        |
| 120                        | 19.51±0.49 / 0.8913                                     | 1.0158±0.0059 / 0.9902               | 71.49±0.91 / 1.0022      | 14.17±0.29 / 0.8862        |
| 150                        | 18.97±0.50 / 0.8666                                     | 1.0142±0.0046 / 0.9886               | 71.53±0.83 / 1.0028      | 13.76±0.27 / 0.8605        |
| 180                        | 18.31±0.47 / 0.8365                                     | 1.0113±0.0048 / 0.9855               | 70.85±0.90 / 0.9933      | 13.11±0.31 / 0.8199        |
| 210                        | 17.79±0.39 / 0.8127                                     | 1.0091±0.0047 / 0.9835               | 70.60±0.73 / 0.9898      | 12.67±0.33 / 0.7924        |
| 240                        | 17.01±0.43 / 0.7771                                     | 1.0013±0.0051 / 0.9757               | 72.31±0.94 / 1.0137      | 12.31±0.24 / 0.7699        |
| 270                        | 16.35±0.54 / 0.7469                                     | 0.9980±0.0062 / 0.9728               | 72.58±0.78 / 1.0175      | 11.84±0.35 / 0.7405        |
| 300                        | 15.98±0.49 / 0.7300                                     | 0.9933±0.0053 / 0.9679               | 71.54±0.90 / 1.0029      | 11.35±0.34 / 0.7098        |

**Table S8** Performance parameters and normalized performance parameters of ten ZnO-based PSCs with the extension of illumination time.

| Illumination<br>Time (min) | $J_{SC}$ (mA cm <sup>-2</sup> )/<br>Normalized $J_{SC}$ | $V_{OC}$ (V)/<br>Normalized $V_{OC}$ | FF (%)/<br>Normalized FF | PCE (%)/<br>Normalized PCE |
|----------------------------|---------------------------------------------------------|--------------------------------------|--------------------------|----------------------------|
| 0                          | 19.20±0.53 / 1.0000                                     | 1.0021±0.0057 / 1.0000               | 67.32±0.92 / 1.0000      | 12.95±0.37 / 1.0000        |
| 10                         | 18.97±0.59 / 0.9880                                     | 1.0017±0.0051 / 0.9996               | 66.12±0.87 / 0.9822      | 12.56±0.42 / 0.9699        |
| 25                         | 18.65±0.48 / 0.9714                                     | 1.0007±0.0049 / 0.9986               | 66.16±0.94 / 0.9828      | 12.45±0.31 / 0.9614        |
| 40                         | 18.05±0.57 / 0.9401                                     | 0.9961±0.0059 / 0.9939               | 67.15±0.75 / 0.9975      | 12.07±0.43 / 0.9320        |
| 60                         | 17.08±0.61 / 0.8896                                     | 0.9832±0.0063 / 0.9811               | 67.82±0.63 / 1.0074      | 11.39±0.37 / 0.8795        |
| 80                         | 16.46±0.45 / 0.8573                                     | 0.9785±0.0061 / 0.9764               | 68.16±0.91 / 1.0124      | 10.98±0.41 / 0.8479        |
| 100                        | 15.68±0.49 / 0.8167                                     | 0.9718±0.0049 / 0.9698               | 67.15±0.69 / 0.9976      | 10.23±0.45 / 0.7900        |
| 120                        | 14.84±0.39 / 0.7729                                     | 0.9631±0.0063 / 0.9611               | 68.70±0.72 / 1.0205      | 9.82±0.39 / 0.7583         |
| 150                        | 13.78±0.49 / 0.7177                                     | 0.9581±0.0058 / 0.9561               | 69.28±0.59 / 1.0290      | 9.15±0.43 / 0.7066         |
| 180                        | 12.94±0.54 / 0.6740                                     | 0.9509±0.0069 / 0.9489               | 70.11±0.90 / 1.0414      | 8.63±0.42 / 0.6664         |
| 210                        | 12.24±0.60 / 0.6375                                     | 0.9439±0.056 / 0.9419                | 69.67±0.78 / 1.0349      | 8.05±0.46 / 0.6216         |
| 240                        | 11.32±0.43 / 0.5896                                     | 0.9373±0.0054 / 0.9353               | 69.38±0.68 / 1.0306      | 7.36±0.42 / 0.5683         |
| 270                        | 10.68±0.37 / 0.5563                                     | 0.9302±0.0063 / 0.9282               | 69.15±0.73 / 1.0272      | 6.87±0.45 / 0.5305         |
| 300                        | 10.34±0.52 / 0.5385                                     | 0.9217±0.0062 / 0.9198               | 68.41±0.89 / 1.0162      | 6.52±0.35 / 0.5035         |

## References

- 1 Y. Guo, L. Kang, M. Zhu, Y. Zhang, X. Li and P. Xu, *Chem. Eng. J.*, 2018, **336**, 732-740.
- 2 X. Ye, C. Zheng, J. Chen, Y. Gao and C. B. Murray, *Nano Lett.*, 2013, **13**, 765-771.
